1

2 **Thinking small: next-generation sensor networks close the size gap in vertebrate**

3 **biologging**

4

5 Simon P. Ripperger<sup>1,2,3,\*</sup>, Gerald G. Carter<sup>2,3</sup>, Rachel A. Page<sup>2</sup>, Niklas Duda<sup>4</sup>, Alexander  
6 Koelpin<sup>5</sup>, Robert Weigel<sup>4</sup>, Markus Hartmann<sup>6</sup>, Thorsten Nowak<sup>6</sup>, Jörn Thielecke<sup>6</sup>, Michael  
7 Schadhauer<sup>6</sup>, Jörg Robert<sup>6</sup>, Sebastian Herbst<sup>7</sup>, Klaus Meyer-Wegener<sup>7</sup>, Peter Wägemann<sup>8</sup>,  
8 Wolfgang Schröder-Preikschat<sup>8</sup>, Björn Cassens<sup>9</sup>, Rüdiger Kapitzka<sup>9</sup>, Falko Dressler<sup>10</sup>, Frieder  
9 Mayer<sup>1,11</sup>

10

11 <sup>1</sup>Museum für Naturkunde, Invalidenstraße 43, 10115 Berlin, Germany

12 <sup>2</sup>Smithsonian Tropical Research Institute, Apartado 0843-03092, Balboa, Ancón, Republic of  
13 Panama

14 <sup>3</sup>Department of Evolution, Ecology, and Organismal Biology, The Ohio State University,  
15 Columbus, OH, USA

16 <sup>4</sup>Institute for Electronics Engineering, Friedrich-Alexander University Erlangen-Nürnberg  
17 (FAU), Wetterkreuz 15, 91058 Erlangen-Tennenlohe, Germany

18 <sup>5</sup>Chair for Electronics and Sensor Systems, Brandenburg University of Technology, Siemens-  
19 Halske-Ring 14, 03046 Cottbus, Germany

20 <sup>6</sup>Institute of Information Technology (Communication Electronics) LIKE, Friedrich-Alexander  
21 University Erlangen-Nürnberg (FAU), Am Weichselgarten 33 in 91058 Erlangen-Tennenlohe

22 <sup>7</sup>Department of Computer Science, Friedrich-Alexander University Erlangen-Nürnberg (FAU),  
23 Martensstr. 3, 91058 Erlangen, Germany

24 <sup>8</sup>Department of Computer Science, Friedrich-Alexander University Erlangen-Nürnberg (FAU),  
25 Martensstr. 1, 91058 Erlangen

26 <sup>9</sup>Carl-Friedrich-Gauß-Fakultät, Technische Universität Braunschweig, Mühlenpfordtstraße  
27 23, 38106 Braunschweig, Germany

28 <sup>10</sup>Heinz Nixdorf Institute and Dept. of Computer Science, Paderborn University, Warburger  
29 Str. 100, 33098 Paderborn, Germany

30 <sup>11</sup>Berlin-Brandenburg Institute of Advanced Biodiversity Research, Altensteinstr. 34, 14195  
31 Berlin, Germany

32 \*Correspondence: [simon.ripperger@gmail.com](mailto:simon.ripperger@gmail.com)

33

34 **Abstract:**

35 Recent advances in animal tracking technology have ushered in a new era in biologging.  
36 However, the considerable size of many sophisticated biologging devices restricts their  
37 application to larger animals, while old-fashioned techniques often still represent the state-of-  
38 the-art for studying small vertebrates. In industrial applications, low-power wireless sensor  
39 networks fulfill requirements similar to those needed to monitor animal behavior at high  
40 resolution and at low tag weight. We developed a wireless biologging network (WBN), which  
41 enables simultaneous direct proximity sensing, high-resolution tracking, and long-range  
42 remote data download at tag weights of one to two grams. Deployments to study wild bats  
43 created social networks and flight trajectories of unprecedented quality. Our developments  
44 highlight the vast capabilities of WBNs and their potential to close an important gap in  
45 biologging: fully automated tracking and proximity sensing of small animals, even in closed  
46 habitats, at high spatial and temporal resolution.

47

48

49 **Keywords:** wireless biologging network (WBN); ultra-low power; automated animal tracking;  
50 proximity sensing; bats; terrestrial biologging

51

## 52 **Introduction**

53 Recent advances in animal tracking technology have ushered in a new era in biologging<sup>1,2</sup>.  
54 By collecting data of unprecedented quantity and quality, automated methods have  
55 revolutionized numerous fields including animal ecology<sup>3</sup>, collective behavior<sup>4</sup>, migration<sup>5</sup>,  
56 and conservation biology<sup>6</sup>. For example, automated tracking of animals from space has  
57 advanced considerably over the past decade, in particular for observing large-scale  
58 movements<sup>1</sup>. However, satellite communication for localization or data access requires a lot  
59 of energy, and heavy transmitters greatly limit our ability to track smaller vertebrate species<sup>1</sup>.  
60 Efforts to further miniaturize increasingly powerful biologging devices culminated in the  
61 launch of the ICARUS initiative in 2019, which aims to achieve global animal observation at a  
62 small tag weight through a combination of GPS tracking, on-board sensing, energy  
63 harvesting, and energy-efficient data access from low space orbit<sup>7</sup>. ICARUS promises a great  
64 step forward in tracking large-scale movements such as migration. GPS tracking, however, is  
65 often not ideal or feasible for field biologists studying behavior on smaller spatial scales. GPS  
66 tracking of small vertebrate species is further limited by the considerable weight of GPS  
67 devices<sup>1</sup>. Satellite reception is hampered by complex habitats and impossible if animals go  
68 inside trees, caves, or underground burrows.

69 In industrial applications or for civilian surveillance, low-power wireless sensor  
70 networks (WSNs) fulfill requirements similar to those needed to track animal behavior at high  
71 resolution and at low tag weight<sup>8</sup>. Consistently, there have been numerous applications for  
72 WSNs in wildlife monitoring ('biologging') since the early 2000s<sup>9</sup>. In the last decade, more  
73 sophisticated approaches have created powerful monitoring systems, e.g., for high-resolution  
74 tracking<sup>10</sup> and fully automated logging of social encounters<sup>11,12</sup>. The major challenge in  
75 developing efficient wireless biologging networks (WBNs) is to design ultra-low power  
76 communication networks in order to maximize performance, minimize energy consumption,  
77 and reduce tag weight.

78 Here, we describe a system that takes WBNs to the next level: a multifunctional and  
79 thus Broadly Applicable Tracking System ('BATS', Figure 1). We first present a solution for

80 direct proximity sensing that enables the collection of proximity data at a temporal resolution  
81 of seconds, at tag weights of one to two grams, and with runtimes of up to several weeks  
82 depending on the sampling rate. Second, we describe an adaptive option for triangulating  
83 spatial positions based on Received Signal Strength (RSS) by ground-borne localization  
84 nodes. This adaptive option allows automated recording of robust movement trajectories  
85 even in structurally complex habitats. Third, we explore a new, almost energy neutral solution  
86 for remote data access over distances of several kilometers at low data rates. Finally, we  
87 present an energy model that shows the effect of the parameter settings of software tasks on  
88 the runtime of the animal-borne tag. First deployments of BATS have resulted in proximity  
89 and tracking data of unprecedented quality and have demonstrated the high potential of  
90 WBNs for studying (social) behavior. Our developments highlight the vast capabilities of  
91 WBNs and their potential to close an important gap in biologging: fully automated tracking  
92 and proximity sensing of small animals, even in closed habitats, at high spatial and temporal  
93 resolution.

94

## 95 **Results**

96 The modular structure of BATS allows researchers to combine proximity sensing, long-range  
97 telemetry, and high-resolution tracking (Figure 1) depending on the research question and  
98 the behavior of the animals. We chose bats to test and validate the system since they are  
99 small-bodied and move fast in dense vegetation, both challenges to the performance of the  
100 WBN. Three recent field studies were conducted in temperate and tropical habitats on three  
101 bat species: greater mouse-eared bats (*Myotis myotis*), common noctules (*Nyctalus noctula*)  
102 and common vampire bats (*Desmodus rotundus*). Each study documented high-resolution  
103 proximity data by direct proximity sensing among animals and automatically forwarding data  
104 to ground nodes (Figure 1a) that were deployed at roosting or foraging sites. Bat-borne  
105 mobile nodes that came within the reception range of the localization grid automatically  
106 increased their sampling rate to enable high-resolution localization (Figure 1b). Data for the  
107 synchronization of clocks was transmitted successfully over distances of more than 4 km by

108 long-range telemetry (Figure 1c). The following sections describe the empirical validation of  
109 the system.

110

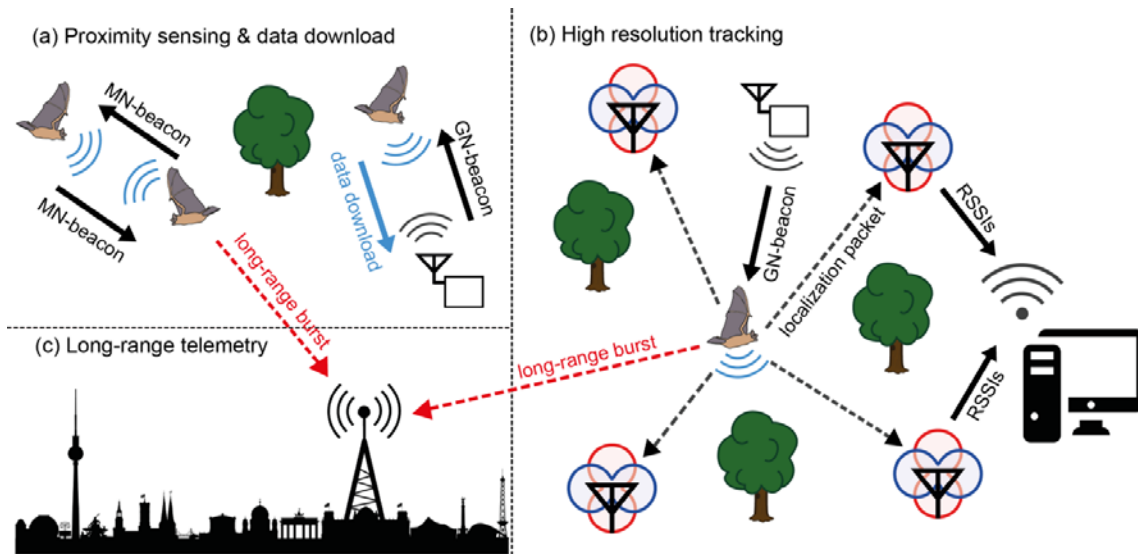

111

112 **Figure 1: BATS overview.** (a) Animal-borne mobile nodes (MNs) document animal-animal  
113 meetings, which are triggered by MN-beacons 24/7 and independently of ground  
114 infrastructure. Each mobile node forwards its meeting data when it receives beacons from a  
115 ground node (GN) that is dedicated to downloading and storing data. (b) When a tagged  
116 animal enters a grid of localization nodes (depicted by an antenna with red/blue gain  
117 patterns), a beacon of a tracking-dedicated GN triggers the transmission of localization  
118 packets from the MN to the localization nodes. Received signal strength indicators (RSSIs) of  
119 the impinging localization packets are then sent from the localization nodes to a work station  
120 via a WLAN. (c) Long-range bursts, which contain encoded sensor data, are received by  
121 long-range receivers. Long-range telemetry enables data transmission over distances of  
122 several kilometers at a low data rate.

123

124 *High-resolution social network data from direct proximity sensing*

125 Fifty individuals of one large natural colony of common vampire bats (*Desmodus rotundus*)

126 were tagged simultaneously in Panama. Associations with other tagged bats are fluid and

127 highly dynamic both during day and night. For example, Figure 2a shows the course of the  
128 meeting history and the dynamic range of degree centrality for a single bat (ID 56) over a  
129 two-day period. The high temporal resolution of meetings (all mobile nodes in reach  
130 communicate with each other every two seconds) also makes it possible to infer a behavior  
131 such as departure from the roost or movement within the roost. For example, foraging bouts  
132 can be identified by a sudden drop in meeting partners at night, which can be verified by  
133 contacts to ground nodes outside the roost. Autonomous direct proximity sensing allows  
134 monitoring changes in roosting associations, caused by moving among subgroups within the  
135 roost (Figure 2b, c) and it also allows inferring 'social foraging networks' outside the roost  
136 (Figure 2d). In addition, every meeting is labeled with a maximum signal strength intensity  
137 indicator (RSSI). This makes it possible to subset the meeting dataset according to signal  
138 strength, an estimate for proximity<sup>13</sup>. RSSI values can distinguish close-contact associations  
139 from associations based on merely occupying the same area.

140         The social networks created from direct proximity sensing are independent of the  
141 whereabouts of the tagged bats and provide an adaptive temporal resolution of seconds.  
142 Almost 400,000 individual meetings were recorded during the first eight days of our field test.  
143 To take bats as an example, the typical approach for collecting social network data has been  
144 to sample some unknown portion of co-roosting associations in a sample of identified roosts  
145 each day<sup>14</sup>. Our system allows complete networks of all bats every few seconds. This  
146 temporal resolution makes changes in social gathering directly visible if time slices in high-  
147 resolution data are small enough<sup>15</sup>. We believe this represents an extraordinary advance for  
148 studying such small free-ranging animals, and it allows for an analytical depth which is so far  
149 known predominantly from human social networks generated by communication among  
150 smart phones or social media<sup>15</sup>.

151

152

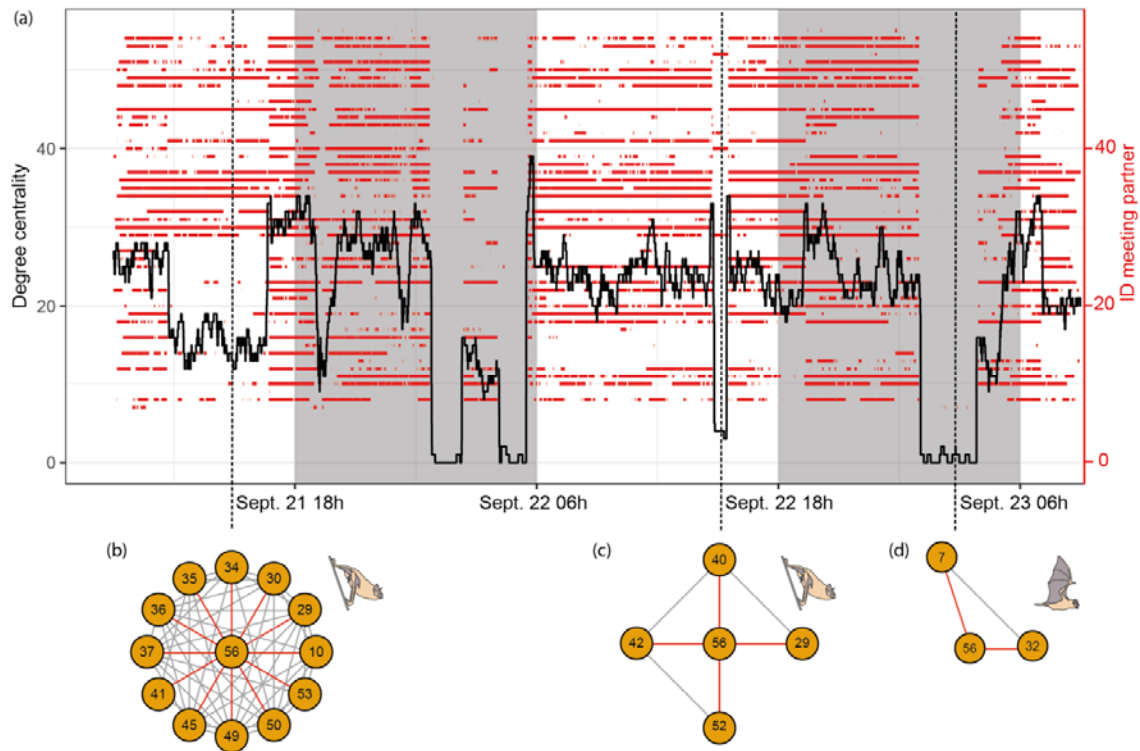

153

154 **Figure 2: High-resolution association data in wild vampire bats.** (a) Meeting history of a  
155 single vampire bat (ID 56; 50 tagged bats in total) with other tagged bats. Red lines show  
156 meetings between bat 56 and other tagged bats (right-hand y-axis). The black line shows the  
157 degree centrality (number of associated tagged bats, left-hand y-axis) of bat 56 every two  
158 seconds. Date and time are on the x-axis. Shaded areas indicate night time. Vertical dashed  
159 lines show egocentric social networks at each snapshot of time during roosting (b,c) and  
160 foraging (d). Associations with the focal bat are indicated by red lines.

161

162 *RSSI-based localization from angle-of-arrival estimation:*

163 Seventeen wireless localization nodes were used to track tagged 11 mouse-eared  
164 bats (*Myotis myotis*) over an area of approximately 1.5 ha in an old, natural deciduous forest  
165 in northern Bavaria (Germany, Forchheim). We were able to reconstruct flight trajectories  
166 from foraging mouse-eared bats. Figure 3b shows as an example two trajectories of one  
167 foraging mouse-eared bat during two different nights in early August.

168 We evaluated the spatial resolution of the tracking system by estimating a trajectory  
169 from a defined reference path using unscented Kalman filters. The reference path and

170 estimated trajectories are shown in Figure 3a. The trajectories were calculated from angle-of-  
171 arrival estimates of signals impinging on localization nodes. Angles were estimated from  
172 difference measurements of received signal strength (RSS) at two orthogonal antenna gain  
173 patterns. This procedure in combination with a set of post-processing techniques for  
174 probabilistic multipath mitigation makes the trajectories robust to multipath propagation. The  
175 calculated trajectory is based on 4,912 data sets, while one set was composed of up to 2x17  
176 RSS difference measurements (one per frequency band), if all 17 localization nodes were  
177 within the reception range of the mobile node. For comparison, we also analyzed four tracks  
178 recorded by a 15 g heavy-duty Ornitela GPS tracker, which is commonly used for tracking  
179 large birds of up to 450 g body weight. The mean positioning error was 7.30 m for the  
180 Ornitela GPS tracker and 5.65 m for the trajectory of the BATS system.

181 We calculated the positioning accuracy at lower densities of the localization grid.  
182 Localization was less accurate with fewer localization nodes (Figure 4), but it was robust and  
183 comparable to the full tracking grid (17 nodes) when using 15 - 16 nodes. With 12 - 14  
184 nodes, we observed increasing variation in average error rates. With 11 nodes, the mean  
185 error was similar to the results from GPS tracking. Variation increased steadily with lower  
186 numbers of nodes and the mean error reached more than 10 m with a maximum error rate of  
187 34 m at 6 nodes. At such low grid densities, the localization results tended to diverge,  
188 resulting in increasing positioning errors. In addition, sparser grids lack robustness against  
189 multi-path scattering. Consequently, the node density may only be reduced to a certain point,  
190 while positioning errors remain quite stable (Figure 4).

191 These analyses show that 11 localization nodes over an area of 1.5 ha in a forested  
192 habitat might be sufficient to construct high-resolution trajectories comparable in quality to a  
193 heavy-duty GPS tracker, which would only last for a few hours using a 15 g device, or to  
194 reverse GPS in open desert habitats<sup>10</sup>. Only moderate resources and human effort are  
195 needed to cover an area of a few hectares. For example, a setup as described above  
196 consisting of 11 localization nodes is deployed and configured by two people in one to two  
197 workdays.



198

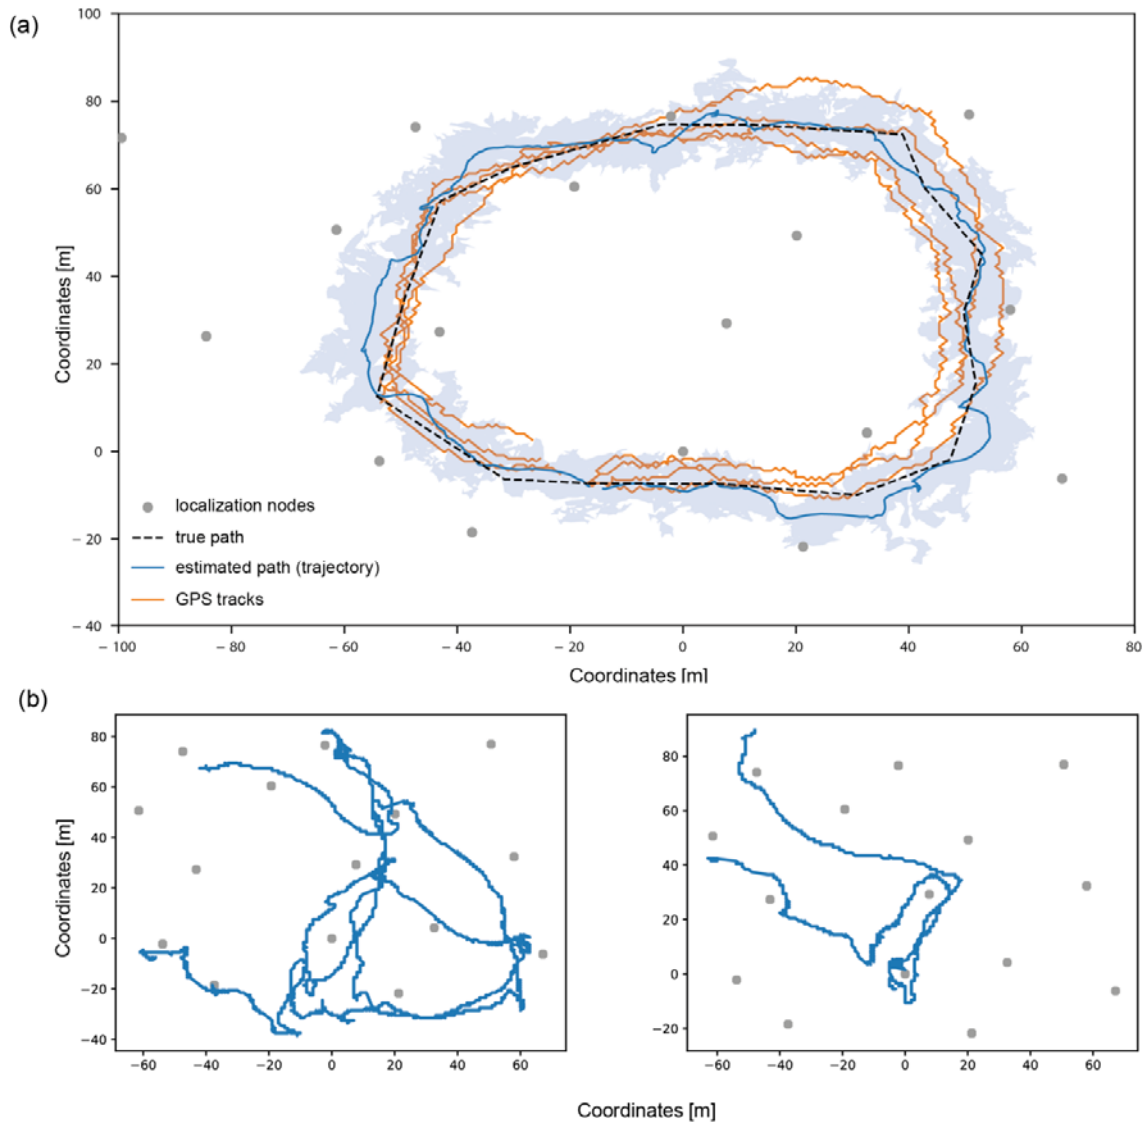

199

200 **Figure 3: Tracking bat movements in a forest.** (a) Tracking grid in a deciduous forest of  
201 Forchheim, Germany, consisting of 17 localization nodes (grey dots) covering an area of ca.  
202 1.5 ha. Dashed black line: known reference path; blue line and blue shading: estimated path  
203 and average localization error obtained by BATS; yellow lines: four individual GPS tracks. (b)  
204 Estimated flight trajectories of a tagged mouse-eared bat during foraging on August 2<sup>nd</sup> and  
205 5<sup>th</sup>.

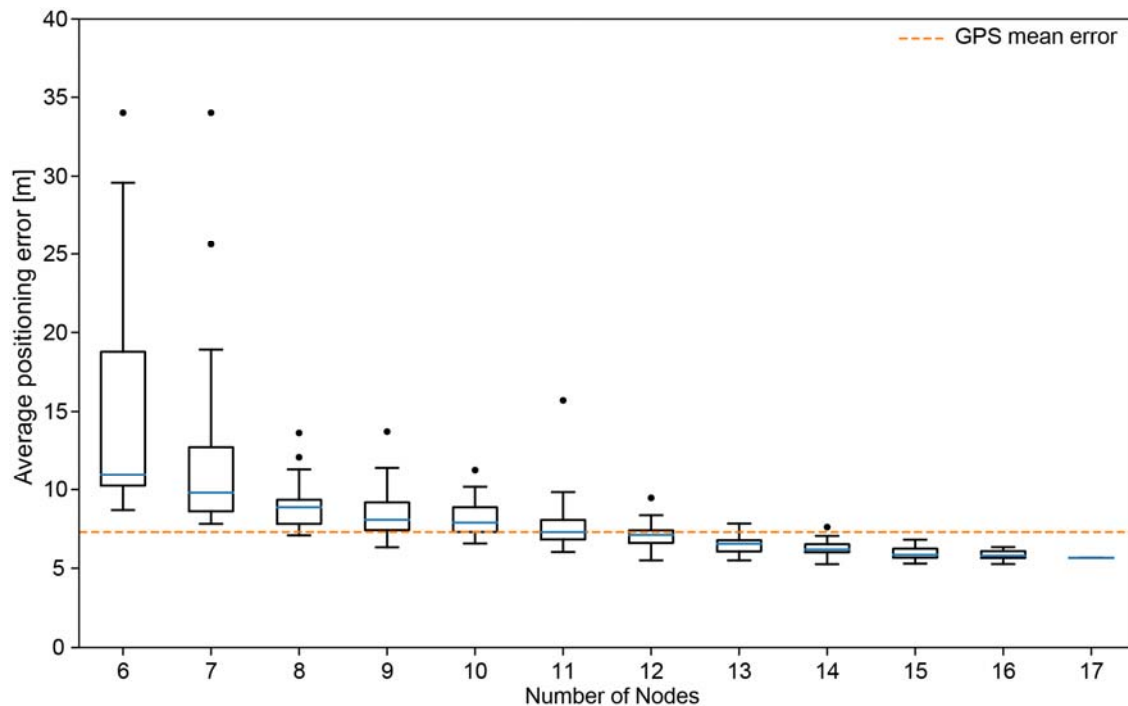

206

207 **Figure 4: BATS tracking performance vs GPS tracking.** Localization errors of a reference  
208 path of ca. 300 m by BATS are shown for different numbers of tracking nodes (6-17) in a  
209 deciduous forest of ca. 1.5 ha area. The average positioning error of four tracks of a heavy-  
210 duty commercial wildlife GPS tracker is shown for comparison by a yellow dashed line.

211

212 *Distance verification of packet transmission by long-range telemetry:*

213 Transmission distances of data packages were measured in an urban green area. 34 noctule  
214 bats (*Nyctalus noctula*) were tagged in a forest within the city of Berlin and two long-range  
215 telemetry receivers were placed at a distance of about 1 and 4 km from the forest.

216 Mobile nodes transmitted with each MN-beacon a burst for long-range transmission of  
217 the mobile node's time stamp. During a period of two weeks, we were able to receive more  
218 than 168,000 long-range bursts, which allowed us to successfully recover 9,511 complete  
219 timestamps from 32 individual bats. To mitigate the impairment by interfering transmission,  
220 one complete long-range telemetry packet is split over 24 single burst transmissions. At the  
221 long-range receiver, 24 subsequent bursts are merged to one actual long-range packet  
222 containing the ID and the bat's time reference. This transmit scheme assures that the mobile  
223 node's transmit module is only activated for a short time period avoiding stress on the

224 batteries and hardware. In addition, it avoids interference of other channels by a time-  
225 frequency hopping pattern in transmission. Instead of a complete package loss, only a  
226 fraction of the collection of bursts might be corrupted, which can be reconstructed by means  
227 of error-correction codes at the receiver side. It is only due to this specialized telegram-  
228 splitting technique<sup>16</sup> that a long-range transmission under extreme power-restrictions and  
229 vastly occupied frequency channels becomes possible.

230 Reception of long-range data should perform best when the tagged bats move in  
231 open airspace. However, we recovered a considerable number of these long-range bursts  
232 while bats were inside their roosts during the day. 563 long-range bursts received during the  
233 day were mapped to the known roosts of the bats, allowing us to measure the transmission  
234 distance. Fifty-seven long-range bursts from four bats inside their roost were recovered over  
235 distances of ca. 4.2 km (between roost 1 or 2 and the receiver at the cogeneration plant,  
236 Supplementary Figure 1). 506 long-range bursts from five tagged bats were recovered at  
237 distances between 667 and 819 m (between roost 1 or 3 and the receiver at the retirement  
238 home, Supplementary Figure 1). Burst retrieval over distances of more than 4 km was  
239 surprising. Theoretical calculations predicted transmission distances of about 5 km assuming  
240 barrier-free transmission<sup>17</sup>. In the field, however, signals had to pass first through the wooden  
241 wall of the tree roost and second the forest's vegetation, which should greatly reduce  
242 transmission distance.

243 Data recovery is a major challenge in automated light-weight tracking-systems. Signal  
244 transmissions inherently suffer from limited transmission power under heavy losses due to  
245 distance, shadowing, and other interfering signals. Remote downlinks, e.g., per GSM (Global  
246 System for Mobile Communications), add considerable weight in the form of circuitry and  
247 battery<sup>1</sup>. Many light-weight trackers must therefore be retrieved, or energy harvesting must  
248 be used to counter-balance the expenses for remote data download<sup>7, 18-20</sup>, again adding  
249 weight for the required hardware components. When tagged animals move on predictable  
250 scales, energy-saving methods like transfer via VHF (Very High Frequency) or radio modems  
251 may be an option to receive data over distances of hundreds of meters to few kilometers<sup>21</sup>.

252 Our scenario explores options to decrease the energy expense for downloading stored data  
253 to a negligible proportion of the overall energy budget (compare Figure 5). For data  
254 download over short distances of ca. 100m, we accumulate and pre-process data on-board  
255 and use sophisticated communication protocols that maximize data-package reconstruction  
256 while minimizing energy demand<sup>22, 23</sup>. The above described long-range telemetry mode  
257 provides an option for robust transmission of small amounts of data at a low rate without the  
258 expenditure of additional energy due to the hybrid modulation of the signal. In comparison,  
259 other long-range systems for biologging, such as LoRa<sup>12</sup>, enable higher transmission rates.  
260 However, the bi-directional communication between transmitter and receiver strongly  
261 increases the energy demand no the mobile node.

262

### 263 *Sensor node energy consumption and lifetime*

264 A major strength of WBNs is the ease of adjusting parameters such as sampling rate and in  
265 turn energy consumption. These adjustments can maximize runtime for a given battery  
266 capacity, or alternatively maximize sampling rate to obtain higher resolution data. To  
267 investigate the impact of the different software-task parameters on runtime, we derived a  
268 model for energy consumption. We computed examples of runtimes of mobile nodes for two  
269 battery capacities and different parameter settings (Table 1). For example, the increase in  
270 energy consumption when tracking two to four hours per day can be compensated by  
271 extending the MN-beacon intervals. We achieve runtimes of at least five days using a 12mAh  
272 battery (corresponding to a 1g mobile node) even at the shortest beacon intervals of two  
273 seconds (active mode) and with two hours of high-resolution tracking per day. Depending on  
274 the parameter settings, we achieve runtimes of up to 13 days using the smaller battery and  
275 25 days using 22mAh (Table 1).

276

277 **Table 1: Estimated runtimes of mobile nodes for two battery capacities of 12 or 22**  
278 **mAh inferred by an energy model for MN-runtime.** While the model comprises seven  
279 energy consuming tasks, the shown runtimes are based only on varying MN-beacon intervals

280 and localization time (i.e. animal is within the localization grid). For MN-beacon intervals two  
 281 operation modes are possible, depending on whether an animal is within reception range of a  
 282 ground node (inactive mode) or not (active mode).

| MN-beacon interval [s]                         |                                        | Time inside tracking<br>grid per day [h] | Estimated runtime<br>[h] for a battery<br>capacity of<br>12 / 22mAh |
|------------------------------------------------|----------------------------------------|------------------------------------------|---------------------------------------------------------------------|
| if absent from<br>ground node<br>(active mode) | if near ground node<br>(inactive mode) |                                          |                                                                     |
| 2                                              | 10                                     | 0                                        | 151 / 278                                                           |
| 10                                             | 30                                     | 0                                        | 321 / 589                                                           |
| 2                                              | 10                                     | 2                                        | 135 / 248                                                           |
| 10                                             | 30                                     | 2                                        | 257 / 471                                                           |
| 30                                             | 60                                     | 4                                        | 247 / 454                                                           |

283

284 Figure 5 illustrates the energy consumption of the different software tasks on the  
 285 mobile nodes of the six different scenarios described in Table 1. When localization is  
 286 disabled (i.e., only proximity sensing), sending out beacons to wake up other mobile nodes to  
 287 initiate meetings strongly drives the energy demand (Figure 5a, b). Therefore, modifying the  
 288 MN-beacon intervals has the highest impact on runtime. When localization is enabled,  
 289 tagged animals send localization packages whenever they enter the tracking grid. The high  
 290 duty-cycle of sending localization packages (8/s) strongly decreases the runtime (Figure 5c-  
 291 e, Table 1). At active/inactive MN-beacon intervals of 2/10s, a daily localization period of two  
 292 hours decreases the overall runtime by 10.8% (Fig 5 a, c, Table 1). At four hours of  
 293 localization, the energy demand for localization dominates the overall energy consumption, in  
 294 particular at high MN-beacon intervals.

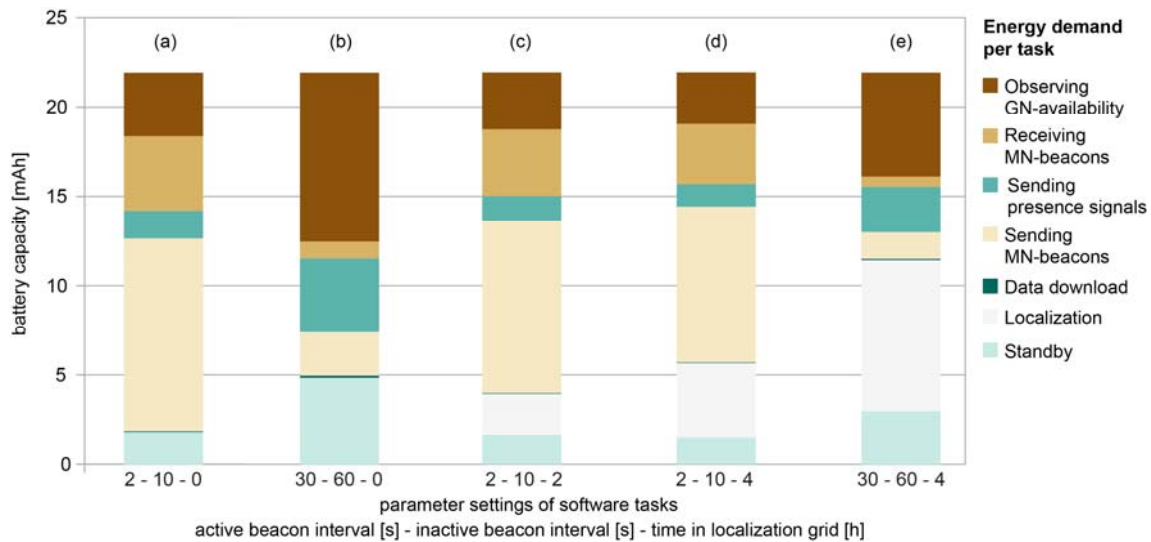

295

296 **Figure 5: Energy distribution of software tasks of a mobile node powered by a 22mAh**

297 **battery.** Energy demand per software task depends on parameter settings for active/inactive  
 298 beacon interval [s] and amount of time an animal spends in the localization grid [h]. The  
 299 energy demand is shown for the seven major software tasks; MN = mobile node, GN =  
 300 ground node. Zero time in the localization grid (a, b) refers to a pure proximity sensing  
 301 scenario.

302

303 Model-derived runtimes were compared with empirical runtimes from field tests on  
 304 noctule bats (*Nyctalus noctula*), where mobile nodes were either powered by a 12mAh  
 305 battery or a 22mAh battery, resulting in MN weights of 1.1g to 1.9g depending on housing.  
 306 The average runtime was 148h (max. 209h) for the small battery, while the model predicted  
 307 151h. For the larger battery, average runtime was 280h (max. 426h) with a predicted  
 308 average value of 277h. For both batteries, the predicted values were very close to the  
 309 observed (1.8% overestimation and 0.7% underestimation, respectively) indicating that the  
 310 model is a reliable tool for experimental design of a field study.

311

## 312 Discussion

313 In past years, developments in high-performance proximity sensing using significantly  
 314 larger animal-borne tags<sup>24</sup> and in ground-based high-resolution tracking in low-clutter desert

315 environments<sup>10</sup> have previously pushed the boundaries of what was technologically feasible.  
316 BATS takes the next step by combining these functionalities while keeping the tag weight at  
317 one to two gram. Adhering to the 5% rule<sup>25</sup>, even animals weighing as little as 20g can be  
318 tagged with this system. These smaller species make up a large proportion of birds and  
319 mammals (see Figure 3 in<sup>1</sup>) and WBNS will give researchers new capabilities to address a  
320 wide range of questions in animal behavior and ecology. Our adaptive and scalable system  
321 design provides great flexibility to tailor such a system, allowing adjustable use for any  
322 species- and study-specific requirement. The design of the mobile node allows to add  
323 multiple functionalities beyond the ones presented here, such as accelerometers,  
324 magnetometers, or even an on-board electrocardiogram (ECG) sensors<sup>26</sup>.

325         An early example of automated tracking of small-bodied animals on a limited  
326 geographic scale was ARTS, a system for automated VHF tracking, which was installed on  
327 Barro Colorado Island, Panama<sup>27</sup>. This six-year endeavor in the 2000s already highlighted  
328 the promising opportunities offered by WBNS: scalability, remote reconfiguration, full  
329 automation, and low-cost tags. Yet, a rather low positioning accuracy (~50 m) and restricted  
330 coverage were limiting factors<sup>27</sup>. Most of today's solutions for automated tracking of small  
331 animals such as songbirds, bats, or rodents perform best at larger geographic scales or in  
332 open habitats. For example, current versions of 1 g GPS loggers are suitable to explore  
333 seasonal large-scale movements<sup>18, 20</sup>. However, they cannot reconstruct flight paths in a  
334 complex environment, since they can only collect around 100 fixes. Furthermore, the  
335 physical devices must be retrieved for data recovery, and satellite reception suffers within  
336 vegetated areas. Alternatively, reverse GPS can track small animals much more energy-  
337 efficiently and at much higher temporal and spatial resolution by measuring time-of-flight at  
338 ground-based receiving stations<sup>10</sup>. However, time-of-flight measurements are inherently  
339 affected by vegetation and perform best in open areas. Therefore, we combined signal  
340 strength measurements (including angle of arrival (AoA) estimates) from two frequency  
341 bands and probabilistic multipath mitigation<sup>28</sup> to create a system that is robust to multipath  
342 propagation and thus performs well in complex environments. Common but costly measures

343 to resolve multipath propagation are large-aperture antenna arrays for AoA tracking or large  
344 signal bandwidth for time-of-flight tracking. However, the future of animal tracking will most  
345 certainly center on low cost, ultra-low power integrated circuits, which are currently  
346 experiencing a noticeable push due to their broad applications in Industry 4.0 and 5G. This  
347 technology has the potential to dramatically boost the capabilities of biologging devices.

348 Contact networks of small-bodied animals have received increased attention in past  
349 years and are most commonly built from RFID- (radio-frequency identification) or PIT-  
350 (passive integrated transponder) tagged animals that were observed to be feeding or  
351 sleeping at the same site at the same time<sup>29-31</sup>. Later developments for direct encounter  
352 logging were able to log association independently of the locality. However, these sensors  
353 were either quite large and heavy<sup>11</sup> or had short runtimes of less than 24h<sup>32</sup> due to the high  
354 energy demand for the permanently active receiver — a major shortcoming for applications  
355 in small-bodied species. We show that the use of wake-up receivers and adaptive operation  
356 paired with novel wireless communication protocols dramatically reduce the energy demand  
357 of such wireless sensor tags. We believe that direct encounter logging or more precisely  
358 proximity sensing will enable diverse research in the future, as this approach creates large  
359 datasets, with additional sensor data providing the behavioral context closing the gap  
360 between social patterns and their underlying processes<sup>2</sup>.

361 Ongoing work on ultra-low power sensor networks not only targets animal tracking  
362 systems but a variety of "Internet of Things"-solutions in general. Energy efficiency is not only  
363 a question of hardware circuit design but also of how to interact across all relevant layers in  
364 the node's software stack (i.e., application, and operating system). On the mobile node, the  
365 interaction aspect between communication layers (e.g., application and MAC layer) concerns  
366 the placement of certain functions (e.g., retransmissions) within the entire software  
367 hierarchy<sup>33</sup> such that energy-efficient operation is not affected by unnecessary functional  
368 redundancies. Besides, cross-layer designs that optimize the timing of communication  
369 processes and make them deterministic at least within limits<sup>34</sup> form the software-engineering  
370 basis for an overall energy-aware systems approach. In our scenario, energy-efficient and



371 reliable communication between nodes are cross-cutting concerns, since failed  
372 communication attempts lead to additional overhead for retransmissions. Very promising  
373 examples for low-power communication initiation are novel selective wake-up receivers<sup>35</sup>,  
374 which allow the small tags to enter sleep modes in the nano-ampere range rather than  
375 constantly operating in the micro- or milli-ampere range. Selective wake-up concepts allow  
376 waking up dedicated recipients of a message (or a selected subset thereof) instead of  
377 waking up all systems in communication range. Integrated into the animal tracking nodes,  
378 this could enable the next quantum leap on low-power operation. The alternative to making  
379 the receiver operate on a lower energy budget is to make the communication more reliable.  
380 Recent advances in integrating coding for forward error correction into such lightweight  
381 systems show very promising results, e.g., using erasure codes<sup>22</sup>. Ultra-reliable  
382 communication protocols currently used in 5G networks can also be applied to localization  
383 nodes, which are used for quasi-live tracking in the bat tracking scenario. For example, the  
384 ground network can be used as a distributed antenna array, which allows the use of smart  
385 decoding algorithms for very weak communication signals to further optimize data recovery<sup>36</sup>.

386

## 387 **Conclusions**

388 There is no single best method for tracking animal behavior. RFID- and PIT-tags allow  
389 monitoring presence of animals at known sites at low cost. Satellite-based localization will  
390 remain the method of choice to monitor large-scale movements such as migration or to  
391 explore unpredictable events such as nomadism<sup>1, 37</sup>. However, we believe that WBNs like  
392 BATS will greatly benefit biologging of small animal species that move over smaller and more  
393 predictable spatial scales, especially inside of habitats where signal transmission is  
394 constrained. The homologies of applications between mobile communications and biologging  
395 (e.g., Bluetooth low energy for communication among mobile nodes<sup>12</sup>) will boost the  
396 development of WBNs. Experimental setups including automated triggers (e.g., acoustic  
397 playbacks or other sensory cues) might easily be integrated and direct proximity sensing will  
398 bring exciting research opportunities. Such setups will allow to study the effect of social

399 network dynamics on phenomena such as transmission of social information<sup>30</sup> and  
400 pathogens<sup>38</sup>, and key ecosystem functions such as pollination and seed dispersal<sup>39</sup>.

401

#### 402 **4. Methods**

403 *The WBN hardware, software, and functionality:*

404 Figure 1 is a schematic overview of BATS. In order to study its performance, we empirically  
405 evaluated the three major functions of the system: proximity sensing (Figure 1a), high-  
406 resolution tracking at local scales (Figure 1b), and long-range telemetry (Figure 1c). See  
407 Glossary (Supplementary Table 1) for definitions of terms.

408

409 *Proximity sensing:*

410 Any given mobile node (MN) dyad generates meetings whenever it comes within reception  
411 range (5 - 10 m depending on the environment). The animal-borne MN consists of a 22mm x  
412 14mm Flex PCB circuit board, which is populated with a central System-on-Chip (EFR32,  
413 Silicon Labs) containing an ARM Cortex-M4 core and two radio frontends for 868/915MHz  
414 and 2.4GHz (Supplementary Figure 2). The transmitter in the sub-GHz frontend periodically  
415 sends MN-beacons, a signal that contains a wake-up sequence. The rate of beacons is  
416 configurable (see below). A low-power wake-up receiver on the MN triggers the conventional  
417 receiver to receive incoming information on the ID whenever a MN-beacon is received from  
418 another MN. Subsequently, a meeting is created between the communicating MN-dyad  
419 (Figure 1a left). While a conventional receiver draws a relatively high current in receiving  
420 mode waiting for incoming packages, a wake-up receiver achieves this functionality with a  
421 low current (yet, at cost of sensitivity and performance). When no further MN-beacons are  
422 received from the meeting partners for 5 MN-beacon intervals, the meeting is closed and  
423 stored to memory along with the ID of the meeting partner, meeting duration, maximum RSSI  
424 and a relative timestamp. The mobile node contains both persistent and volatile random-  
425 access memory for data storage.

426           The conventional receiver of the sub-GHz frontend is periodically activated to observe  
427 the presence of a ground node (at a fixed interval of every two seconds), which is indicated  
428 by a ground node beacon (GN-beacon), periodically broadcast by the transmitter of each  
429 ground node (Figure 1a right). The transmitter supports several configurations defining the  
430 main purpose of the ground node (GN) and enabling location-dependent adaptive operation  
431 of the WBN. (i) A download-dedicated GN broadcasts a signal that enables transmitting MN  
432 data based on a customizable RSSI threshold received at the mobile node. (ii) A tracking-  
433 dedicated ground node positioned within the grid of localization nodes for high-resolution  
434 tracking broadcasts a signal that activates the 2.4GHz frontend in addition to the sub-GHz  
435 front end on the MN, transmitting 'localization packets' at a rate of 8 packets per second. (iii)  
436 A presence-detection-dedicated GN triggers the transmission of 'presence signals' by an MN  
437 and stores incoming signals which can be used to determine presence/absence of tagged  
438 individuals (presence at resources or at sleeping sites). Combinations of functionalities (i-iii)  
439 may be used in a single GN if desired (e.g., a tracking-dedicated GN can also trigger data  
440 download). Incoming MN data is received by the GN and stored by a Raspberry Pi  
441 (Raspberry Pi Foundation, Cambridge, UK) to a SD card along with the ID of the transmitting  
442 MN and the receiving GN, respectively, and a timestamp, which is provided by a GPS unit.  
443 The Raspberry Pi also hosts a WiFi allowing the user remote data access.

444           Visualization of proximity sensing data is facilitated by the custom-made software  
445 'meeting splitter' (see Figure 2). For each specified mobile node ID, the current meeting  
446 partners are projected onto a discrete time axis (one second resolution). We specified a  
447 configurable time window around each point on the time axis (five seconds in case of Figure  
448 2). All ongoing meetings, which overlap with the window around the respective point in time,  
449 are included in the set of associated bats at this particular point in time. The result per bat is  
450 a set of associated bats per each second in the dataset. A subsequent automated analysis  
451 classifies each meeting as inside or outside the roost, depending on the number of  
452 simultaneous meeting partners (not applied in this manuscript).

453

454 *RSSI-based high-resolution tracking:*

455 Localization nodes (LN) perform field strength measurements, which are collected by WLAN  
456 and are processed by a PC including a file system whenever animal-borne mobile nodes  
457 enter the localization grid (Figure 1b; localization nodes collect localization packets from  
458 mobile nodes; the transmission is triggered by a ground node). Each localization node  
459 comprises a software-defined radio (consisting of a radio-frequency frontend, a highly  
460 integrated analog-to-digital converter, a field-programmable gate array and a microcontroller)  
461 and two receiving antenna gain patterns each with two main lobes (Figure 1b, red and blue  
462 pattern, respectively). The bi-lobed shape indicates the directional sensitivity of the antenna,  
463 while the direction of each lobe represents its maximum in sensitivity. The red pattern is  
464 rotated by 90° compared to the blue pattern, and both are simultaneously used to estimate  
465 the angles of arrival (AoA) of the localization packages transmitted by the animal-borne MNs.  
466 The difference in received signal strength (RSS) of the two patterns relates to AoA: If the  
467 difference – RSS of the blue pattern minus RSS of the red pattern – is maximum, the wave  
468 front impinges on the localization node either from east or west; if the RSS difference is  
469 minimum, the direction of arrival is N or S. Accordingly, there are four options for the AoA if  
470 the difference is zero: NE, NW, SE or SW. These ambiguities are resolved by fusing  
471 measurements of several localization nodes.

472 This design allows us to exploit not only error-prone absolute field strength  
473 measurements<sup>40</sup>, but also fail-safe angles of arrival. These are not affected by faulty  
474 propagation laws or shadowing effects, because both error sources disappear when forming  
475 the RSS differences. The angular resolution of the AoA estimates improves with increasing  
476 ambiguity of the antenna pattern designs. However, more localization nodes have to be in  
477 reach to resolve the ambiguity<sup>41</sup>. During the Forchheim field trial, we collected up to 272  
478 angle estimates per second when all 17 localization nodes were in reception range.

479 To further improve localization accuracy, we exploited three sources of information  
480 ((a) model-based Bayesian positioning, (b) frequency diversity, (c) retrodiction), which  
481 increase robustness against multipath propagation. This effect complicates the positioning

482 process, in particular in structurally complex environments since wave fronts impinge a  
483 localization node out of the different directions of multiple reflectors (e.g., surrounding  
484 vegetation). The information sources to counteract multipath-related adverse effects are  
485 described in the following:

486       (a) *Model-based Bayesian positioning*: Due to the nature of multipath propagation, a  
487 stochastic model can be devised to characterize the resulting spread in the AoA estimates<sup>28</sup>.  
488 This AoA measurement model can be incorporated into the likelihood function of the  
489 recursive Bayesian positioning process, e.g., based on a Kalman filter or a related grid-based  
490 estimation filter<sup>42</sup>. The recursive estimation process yields a probability distribution  
491 characterizing where the bat may be, considering propagation characteristics from a local  
492 channel model<sup>43</sup>. All measurements are fused during the recursive process taking into  
493 account a movement model reflecting the flight characteristics of a bat (e.g., max. flight  
494 speed). The better the agreement of the various AoA estimates, the more pronounced the  
495 positioning probability distribution.

496       (b) *Frequency diversity*: Multipath propagation leads to frequency-dependent fading.  
497 We therefore measured field strength not only on the primary far-reaching carrier frequency  
498 at 868 MHz, but also on a secondary carrier frequency at 2.4 GHz. On both carrier  
499 frequencies, wave forms comprising several subcarriers are employed to enhance the field-  
500 strength based AoA estimation process. Due to the large carrier frequency separation (>  
501 1.4GHz), frequency-dependent fading effects are de-correlated even if multipath time-of-flight  
502 differences are minor, i.e., in the range of a few meters, which corresponds to our accuracy  
503 level.

504       (c) *Retrodiction*. If we do not have to estimate the position of a particular bat in real-  
505 time, we can exploit all measurements of a bat to estimate a complete trajectory. Forward-  
506 backward filtering enhances estimation quality considerably, yielding a positioning quality in  
507 the range of 4 m ( $1 - \sigma$ ). Performance limits of field-strength based positioning have been  
508 discussed in depth<sup>41, 44</sup>.

509

510 We evaluated the trade-off between tracking grid density and localization quality for the  
511 Forchheim setup, which comprised 17 localization nodes. In particular, we asked: how many  
512 localization nodes are required to obtain localization quality comparable to heavy-duty GPS  
513 tracking? We selected subsets of 6 to 16 out of the 17 localization nodes in order to observe  
514 the decrease in positioning accuracy with decreasing grid density. Trajectories including  
515 standard deviation were estimated for each subset of localization nodes. 17 configurations  
516 were calculated for the grid consisting of 16 nodes (all possible subsets of the full grid) and  
517 25 unique, randomly chosen subsets for all remaining grid configurations (6 to 15 nodes,  
518 respectively) to obtain average errors for the given number of nodes (see Figure 4).

519

#### 520 *Long-range telemetry*

521 Our long-range telemetry approach aimed at transmitting long-range bursts from mobile  
522 nodes over distances of up to several kilometers – much longer distances than our  
523 download-dedicated ground nodes would allow for – within the city of Berlin, under harsh  
524 shadowing by obstacles (vegetation, buildings, etc.) or in presence of numerous interferers.  
525 We periodically transmitted ‘long-range bursts’, i.e., relative timestamps in form of seconds  
526 since mobile node start-up generated by a simple clock counter. These timestamps are  
527 crucial for post-processing of meeting because they allow accounting for clock drift on the  
528 mobile node. We embedded the long-range functionality into the existing modulation scheme  
529 using a hybrid phase-alternating modulation on top of the pure amplitude-modulated wake-up  
530 sequences of the MN-beacon<sup>45</sup>. As a consequence of the extreme energy limitation of the  
531 MN, we ensured the required Signal-to-Noise-Ratio (SNR) by counterbalancing the rate and  
532 the desired transmission distance. The combination of the hybrid modulation, the channel  
533 encoding procedure<sup>17, 45</sup> and the ‘Telegram-splitting’ technique<sup>16</sup> enables an ultra-low power  
534 long-range transmission without additional expenditure of energy. The long-range bursts  
535 were received at two long-range receivers, which were deployed on exposed sites (rooftops)  
536 at distances of ca. 200 - 1,800m (retirement home) and 3,300 - 4,500m (cogeneration plant;

537 see Figure S1) to the proximate respectively ultimate border of the urban forest where the  
538 roosts of the tracked bats were located.

539 We quantified communication distances in the field, which was possible when a  
540 tagged bat occupied a known roost and was simultaneously received by the long-range  
541 receiver. We therefore matched timestamps of signals received simultaneously by GNs at  
542 roosting sites and at long-range receivers. In case of a match, we quantified the distances  
543 between roosts and long-range receivers in the R package geosphere using the Haversine  
544 function<sup>46</sup>. The empirically assessed communication distances have then been compared to  
545 a theoretical model of long-range transmission distances<sup>47</sup>. This model evaluates achievable  
546 rate and distance of transmission based on the energy relation of the SNR, presuming the  
547 transmission power given by the MN's hardware configuration and a desired target payload  
548 rate. For simulating the channel characteristics faced by the MN, the model comprises  
549 parameters like the path loss in dependence of the signal-center frequency, the transmission  
550 distance and receiver and transmitter heights. Environmental influences like attenuation by  
551 obstacles, multi-path propagation or unpredictable rotation of the MN's rod antenna are  
552 incorporated by means of a random variable, stating the superimposed attenuation effects.  
553 Based on these assumptions we were capable of overcoming path losses of over 150dB for  
554 a distance of 5 km and more, under reasonable rates of packet loss<sup>17</sup>, thus accomplishing an  
555 ultra-robust implementation supporting payload data rates of a few bits per second.

556

### 557 *Sensor node energy consumption and runtime*

558 A crucial aspect for biologging is knowledge on the runtime of the sensor nodes. Static  
559 program-code analysis methods of the mobile node are able to determine upper bounds on  
560 the nodes' runtime<sup>48</sup>. However, in the context of the BATS tracking system, precise estimates  
561 for the average uptimes of the system proved to be more beneficial for the empirical studies  
562 than upper bounds for the lifetime. Consequently, we focused on an energy model to  
563 determine the average runtime of the mobile nodes, which is strongly dependent on the tasks  
564 executed by the software. Our models are based on measurements of each executed task in

565 combination with empirically determined activity parameter of each task. That way, we  
566 ensure highest accuracy for our model. In our setting, seven different tasks are implemented:  
567 (i) Standby, (ii) sending MN-beacons, (iii) receiving MN-beacons, (iv) observing ground node  
568 availability, (v) transmitting data to a ground node, (vi) sending localization packets, and (vii)  
569 sending presence signals (see Table S Glossary for definition of terms).

570

571 We determined the runtime by using the specific energy demand for a task and by translating  
572 it to an average current draw. With the average current draw and a given battery capacity,  
573 the runtime can be computed as follows:

$$T_{runtimeavg} = \frac{E_{battery} \cdot \eta_{DCDC}}{\sum I_{tasks}}$$

574

575  $\eta_{DCDC}$  represents the efficiency of the DCDC-converter, which is permanently active and  
576 consumes energy. Determining  $\eta_{DCDC}$  is impractical, because it highly depends on the  
577 actual current drain of the application for the entire runtime. For this reason, we assume a  
578 fixed efficiency of 0.95, which translates to only 95% of the battery capacity being available  
579 for software tasks. This way, losses caused by the DCDC and parasitic discharges of the  
580 battery are modeled in a coarse-grained manner.

581 The idle current during standby is given in a current draw, which does not require any  
582 further calculations. The other tasks (e.g., observing GN availability, sending localization  
583 packets) are executed in predefined cycle times (duty cycle). Based on the measured energy  
584 demand and the duty cycle, we calculated an average current draw for each task. The  
585 energy demand for each task was measured in the lab with an Agilent DC power analyzer  
586 precise source meter. In the case of a localization packet, which is sent every 128ms, the  
587 average current draw can be expressed as follows:

588

$$I_{localization} = \frac{E_{localizationpacket}}{T_{dutycycle} \cdot V_{supply}} \cdot \frac{T_{localization}}{T_{day}}$$



589 The average time spent inside the localization grid ( $T_{localization}$ ) per day is strongly dependent  
590 on the species-specific animal behavior and the experimental design. For the calculations  
591 presented here, we set the daily localization period to 2 or 4 hours, respectively.

592 Observing a ground node in receiving range is carried out at a fixed duty cycle of 2  
593 seconds. Here, the task is independent of the behavior of the tracked animal and the energy  
594 demand is calculated as follows:

$$I_{basestationRX} = \frac{E_{basestationRX}}{T_{dutycycle} \cdot V_{supply}}$$

595 The transmission rate of MN-beacons and presence signals is adaptive based on the contact  
596 to a ground node (i.e., a mobile node near a GN at a roost will decrease the duty cycle in  
597 comparison to a MN on a foraging animal which is not in reception range of a GN). In turn,  
598 the energy demand for sending beacons and presence signals highly depends on the  
599 behavior of the tracked study species and the individual animal (e.g., time spent near GNs at  
600 roosting sites). We therefore used empirical data obtained in the Berlin field test to inform our  
601 energy model with realistic averaged parameter values for duty cycles of each task and the  
602 amount of transmitted data. We quantified the average time-tagged bats spent in reception  
603 range of a GN (inactive mode, decreased duty cycle) versus the time bats spent outside the  
604 reception range of any GN (active mode, increased duty cycle). The common noctule bats in  
605 the Berlin field test spent on average 47% of the observation time in the inactive mode and  
606 the energy demand for transmitting beacons and presence signals calculates as follows:

$$I_{beaconTX} = \frac{E_{beaconTX}}{V_{supply}} \cdot \left( \frac{r_{inactive}}{T_{inactive}} + \frac{1 - r_{inactive}}{T_{active}} \right)$$

607

$$I_{presenceTX} = \frac{E_{presenceTX}}{V_{supply}} \cdot \frac{r_{inactive}}{T_{inactive}}$$

608

609 Receiving a MN-beacon depends on the duty cycle at which beacons are transmitted and on  
610 the number of mobile nodes in receiving range. During the Berlin field test, we calculated the  
611 average number of 2.05 maximum parallel meetings.

$$I_{beaconRX} = \frac{E_{beaconRX} \cdot N_{avgEncounter}}{V_{supply}} \cdot \left( \frac{r_{inactive}}{T_{inactive}} + \frac{1 - r_{inactive}}{T_{active}} \right)$$

612

613 For data download to a GN, we assumed static energy consumption (the energy demand for  
614 sending a data packet highly depends on the size of the packet to be transmitted<sup>23</sup>. The  
615 number of data packets to be transmitted is again dependent on the behavior of the tracked  
616 animal (depending on how many meetings an individual accumulates). Mobile nodes on  
617 common noctule bats sent on average 23.7 packages per hour to a ground node. Thus the  
618 current draw can be denoted as:

$$I_{download} = \frac{E_{packet} \cdot N_{packetsperhour}}{3600s \cdot V_{supply}}$$

619 Based on these calculations, we matched the estimated average runtimes to the observed  
620 runtimes during the Berlin field test (based on the last beacon or packet received from each  
621 individual tagged bat).

622

623 *Adaptive operation, scalability, and reconfiguration:*

624 The adaptive operation contributes to the energy efficiency of BATS. We define location-  
625 specific communication schemes on the mobile nodes which are initiated by ground nodes.  
626 At a noctule bat day roost, for example, GNs activated the inactive beacon interval where  
627 MN-beacons for meeting generation were only sent every 10 seconds. When tagged bats  
628 leave their roost and move beyond the reception range of the GN, the MN switches to the  
629 active interval, sending a MN-beacon every two seconds, which increases the probability to  
630 detect also very short meetings in comparison to the inactive rate. Similarly, localization  
631 packets, which strongly increase the energy demand, should only be sent when the tagged  
632 animal moves within the tracking grid and are therefore triggered by a GN within the grid.

633 BATS tracks multiple individuals simultaneously. Our current design allows for the  
634 observation of up to a theoretical maximum of 60 individuals. Field deployments containing  
635 11 to 50 tagged bats empirically validated this targeted scalability. The scale of the

636 localization grid can be adapted to the ranges required for experimental setups. While we  
637 tracked mouse-eared bats on 1.5ha, smaller areas might be sufficient to track, e.g., rodents  
638 (bank voles, which showed a density of 40 - 162 individuals per hectare, have been tracked  
639 on less than 0.5ha using automated VHF telemetry<sup>49</sup>). Tracking grids larger than 1.5ha are  
640 certainly possible from a technological point of view. Yet, one has to keep in mind that effort  
641 for maintenance (e.g., replacing power sources for localization nodes) scales with the size of  
642 the tracking grid.

643         Since settings for communication schemes are sometimes difficult to pick a priori, we  
644 built an option for reconfiguration of so-called 'soft-settings' (active/inactive rate of MN-  
645 beacons, RSSI-thresholds for data download, localization interval, or timeout duration after  
646 which a running meeting is terminated, etc.). Four values for every soft-setting (e.g., active  
647 rate 2s, 4s, 10s, 30s) can be defined a priori and during operation ground nodes can be used  
648 to trigger a switch between these pre-defined values at the mobile node.

649

650 *Field deployments:*

651 BATS functions as a modular system and hardware setup and software configurations are  
652 easily tailored to a specific use case. We evaluated BATS during three major field studies by  
653 applying mobile nodes to vampire bats, noctule bats, and mouse-eared bats with body  
654 weights of 27 - 48g, 18 - 35g, and 22 - 28g respectively. While at least two of the three major  
655 functionalities (proximity sensing, high-resolution tracking, long-range telemetry) have been  
656 used in all three field studies, we focus on one specific functionality per deployment.

657

658 *Proximity sensing in vampire bats:*

659 We tagged 50 common vampire bats (*Desmodus rotundus*; 44 adult females, 6 subadults)  
660 from a colony roosting in a cave tree near Tolé, Panama, to document social networks with  
661 high resolution. Field work was conducted during September and October 2017. Mobile  
662 nodes were powered by a 22mAh LiPo battery and housed in a 3D-printed plastic case,  
663 resulting in a total weight of 1.8g. One download-dedicated ground node was positioned

664 inside the roost and five ground nodes were placed on surrounding cattle pastures to detect  
665 the presence of foraging or commuting bats.

666

#### 667 *Long-range telemetry in noctule bats:*

668 We captured and tagged 34 common noctule bats (*Nyctalus noctula*; 19 adult females and  
669 15 juveniles) from two bat boxes in a nursing colony an urban forest in the city of Berlin,  
670 Germany ('Königsheide Forst')<sup>50</sup>. Mobile nodes were powered by either a 12mAh or a 22mAh  
671 battery and were housed either in a 3D-printed plastic case or in a fingertip of a nitrile lab  
672 glove that was sealed with glue. Total weight varied between 1.1 - 1.9g depending on  
673 housing and battery. We positioned 5 ground nodes underneath known roosts to document  
674 the presence of individual bats and to remotely download data. In addition, we set up two  
675 long-range receivers to evaluate model-based predicted data retrieval over distances of up to  
676 4-5km<sup>17</sup>. This opportunity is particularly valuable to retrieve data of tagged individuals that  
677 moved to an unknown roost.

678

#### 679 *High-resolution tracking of mouse-eared bats*

680 We captured 11 mouse-eared bats (*Myotis myotis*) using mist-nets set up at ground level in a  
681 mature deciduous forest near Forchheim, Germany. When hunting for ground beetles,  
682 mouse-eared bats are faithful to their foraging sites for consecutive days. We therefore mist-  
683 netted bats at an attractive foraging site rather than catching them from a roost in order to  
684 track repeated bouts by returning individuals over the course of several days. Mobile nodes  
685 were powered by 22mAh batteries and housed in fingertips of nitrile lab gloves (total weight  
686 1.4g). At the capture site we installed a tracking grid consisting of 17 localization nodes  
687 covering roughly an area of 1.5ha (see Figure 3). Distance between tracking stations varied  
688 between ca. 25 - 40m. The irregular configuration was due to the presence of thick trees. We  
689 aimed at positioning tracking stations at least 3 - 5m away from trees to reduce shielding of  
690 the signal. We set up a polygon-shaped reference path for estimating localization errors and  
691 determined the true position of the corners using a Leica Robotic Total Station TS16

692 (positioning error < 5cm). Corners were connected using strings, and we walked either a  
693 sensor node (once) or a GPS tracker (four times) (Ornitela OrniTrack-15; a 15g solar  
694 powered GPS-GSM/GPRS tracker; maximum logging rate 1 fix per second at a lifetime of ca.  
695 4h without solar harvesting) along the calibration path and calculated the average localization  
696 error based on the obtained tracks.

697

### 698 *Ethics*

699 Work on vampire bats: All experiments were approved by the Smithsonian Tropical Research  
700 Institute Animal Care and Use Committee (#2015-0915-2018-A9 and #2017-0102-2020) and  
701 by the Panamanian Ministry of the Environment (#SE/A-76-16 and #SE/AH-2-17).

702 Work on noctule bats: All necessary permits were obtained from SenStadtUm (I E 222/OA-  
703 AS/G\_1203) and LaGeSo (I C 113-G0008/16).

704 Work on mouse-eared bats: All experiments were approved by the government of Upper  
705 Franconia (55.1-8642.01-15/13) and by the government of Lower Franconia (55.2-DMS-  
706 2532-2-181).

707

### 708 **5. Acknowledgements**

709 This study was funded by grants of the Deutsche Forschungsgemeinschaft (FM, AK, RK,  
710 KMW, WSP, JT, JR, FD) within the research unit FOR-1508, a Smithsonian Scholarly  
711 Studies Awards grant (RAP, GGC, SPR, FM), and a National Geographic Society Research  
712 Grant WW-057R-17 (GGC). We thank M Mutschlechner, M Nabeel, J Blobel, and M Hierold  
713 for their contributions within the scope of the research unit. We highly appreciate logistical  
714 support during the Forchheim field study by Naturstrom, MTS Meixner Transporte + Service,  
715 C. Kreul GmbH & Co. KG, Spedition Pohl GmbH & Co. KG, and Siedlergemeinschaft  
716 Lichteneiche. We are grateful to J Berrío-Martínez, D Josic, M Nowak, G Cohen, L Günther,  
717 H Wieser, C Rüstau, B Peiffer, M Hammer, F Oehme and his BUND group of volunteers for  
718 their support during field work. We express our particular thanks to J and C Mohr, who have

719 substantially contributed to the success of our field work. We thank E. Siebert for making the  
720 line work of *D. rotundus*.

721

## 722 **Author contributions**

723 SPR and FM conceived the ideas and designed the biologging studies; ND, BC, MH, TN,  
724 PW, and MS developed and tested the tracking technology; SPR, GGC, ND, BC, MH, TN,  
725 and MS collected the data; MH, TN, MS, SH, BC, PW and SPR analyzed the data; SPR led  
726 the writing of the manuscript. SPR, GGC, RAP, AK, RW, JT, JR, KMW, WSP, RK, FD, and  
727 FM contributed to acquiring funds. All authors contributed critically to the drafts, gave final  
728 approval for publication and agree to be held accountable for the work performed therein.

729

## 730 **References**

- 731 1. Kays, R., Crofoot, M.C., Jetz, W. & Wikelski, M. Terrestrial animal tracking as an eye on life  
732 and planet. *Science* **348**, aaa2478 (2015).
- 733 2. Krause, J. et al. Reality mining of animal social systems. *Trends Ecol. Evol.* **28**, 541-551  
734 (2013).
- 735 3. Wilmers, C.C. et al. The golden age of bio-logging: how animal-borne sensors are advancing  
736 the frontiers of ecology. *Ecology* **96**, 1741-1753 (2015).
- 737 4. Hughey, L.F., Hein, A.M., Strandburg-Peshkin, A. & Jensen, F.H. Challenges and solutions for  
738 studying collective animal behaviour in the wild. *Philosophical Transactions of the Royal  
739 Society B: Biological Sciences* **373**, 20170005 (2018).
- 740 5. McKinnon, E.A. & Love, O.P. Ten years tracking the migrations of small landbirds: Lessons  
741 learned in the golden age of bio-logging. *The Auk* **135**, 834-856 (2018).
- 742 6. Fraser, K.C. et al. Tracking the conservation promise of movement ecology. *Frontiers in  
743 Ecology and Evolution* **6**, 150 (2018).
- 744 7. Curry, A. The internet of animals that could help to save vanishing wildlife. *Nature* **562**, 322  
745 (2018).
- 746 8. Oppermann, F.J., Boano, C.A. & Römer, K. in *The Art of Wireless Sensor Networks* 11-50  
747 (Springer, 2014).

- 748 9. Juang, P. et al. Energy-efficient computing for wildlife tracking: design tradeoffs and early  
749 experiences with ZebraNet. *SIGPLAN Not.* **37**, 96-107 (2002).
- 750 10. Toledo, S., Kishon, O., Orchan, Y., Shohat, A. & Nathan, R. in Software Science, Technology  
751 and Engineering (SWSTE), 2016 IEEE International Conference on 51-60 (IEEE, 2016).
- 752 11. Rutz, C. et al. Automated mapping of social networks in wild birds. *Curr. Biol.* **22**, R669-R671  
753 (2012).
- 754 12. Ayele, E.D., Meratnia, N. & Havinga, P.J. in New Technologies, Mobility and Security (NTMS),  
755 2018 9th IFIP International Conference on 1-5 (IEEE, 2018).
- 756 13. Ripperger, S. et al. Automated proximity sensing in small vertebrates: design of miniaturized  
757 sensor nodes and first field tests in bats. *Ecology and Evolution* **6**, 2179-2189 (2016).
- 758 14. Wilkinson, G.S. et al. Kinship, association, and social complexity in bats. *Behav. Ecol.*  
759 *Sociobiol.* **73**, 7 (2019).
- 760 15. Sekara, V., Stopczynski, A. & Lehmann, S. Fundamental structures of dynamic social  
761 networks. *Proceedings of the national academy of sciences* **113**, 9977-9982 (2016).
- 762 16. Kilian, G. et al. Increasing Transmission Reliability for Telemetry Systems Using Telegram  
763 Splitting. *IEEE Transactions on Communications* **63**, 949-961 (2015).
- 764 17. Schadhauer, M., Robert, J. & Heuberger, A. in Smart SysTech 2017; European Conference  
765 on Smart Objects, Systems and Technologies 1-8 (VDE, 2017).
- 766 18. Hallworth, M.T. & Marra, P.P. Miniaturized GPS tags identify non-breeding territories of a  
767 small breeding migratory songbird. *Scientific reports* **5**, 11069 (2015).
- 768 19. Cvikel, N. et al. Bats Aggregate to Improve Prey Search but Might Be Impaired when Their  
769 Density Becomes Too High. *Curr. Biol.* **25**, 206-211 (2015).
- 770 20. Conenna, I., López-Baucells, A., Rocha, R., Ripperger, S. & Cabeza, M. Movement  
771 seasonality in a desert-dwelling bat revealed by miniature GPS loggers. *Movement ecology* **7**,  
772 1-10 (2019).
- 773 21. Tomkiewicz, S.M., Fuller, M.R., Kie, J.G. & Bates, K.K. Global positioning system and  
774 associated technologies in animal behaviour and ecological research. *Philosophical*  
775 *Transactions of the Royal Society B: Biological Sciences* **365**, 2163-2176 (2010).
- 776 22. Dressler, F. et al. Monitoring Bats in the Wild: On Using Erasure Codes for Energy-Efficient  
777 Wireless Sensor Networks. *ACM Transactions on Sensor Networks (TOSN)* **12**, 1-29 (2016).

- 778 23. Cassens, B. et al. in Proceedings of the 2019 International Conference on Embedded  
779 Wireless Systems and Networks 59-70 (Junction Publishing, 2019).
- 780 24. St Clair, J. et al. Experimental resource pulses influence social-network dynamics and the  
781 potential for information flow in tool-using crows. *Nature Communications* **6**, 7197 (2015).
- 782 25. O'Mara, M.T., Wikelski, M. & Dechmann, D.K. 50 years of bat tracking: device attachment and  
783 future directions. *Methods in Ecology and Evolution* **5**, 311-319 (2014).
- 784 26. Duda, N. et al. in 2019 IEEE Topical Conference on Wireless Sensors and Sensor Networks  
785 (WiSNet) 1-4 (IEEE, 2019).
- 786 27. Kays, R. et al. Tracking Animal Location and Activity with an Automated Radio Telemetry  
787 System in a Tropical Rainforest. *The Computer Journal* (2011).
- 788 28. Nowak, T., Hartmann, M., Tröger, H.-M., Patino-Studencki, L. & Thielecke, J. in 2017 IEEE  
789 International Conference on Communications Workshops (ICC Workshops) 1024-1029 (IEEE,  
790 2017).
- 791 29. Kerth, G., Perony, N. & Schweitzer, F. Bats are able to maintain long-term social relationships  
792 despite the high fission–fusion dynamics of their groups. *Proceedings of the Royal Society B:  
793 Biological Sciences* **278**, 2761-2767 (2011).
- 794 30. Aplin, L.M. et al. Experimentally induced innovations lead to persistent culture via conformity  
795 in wild birds. *Nature* **518**, 538-541 (2015).
- 796 31. Lopes, P.C., Block, P. & König, B. Infection-induced behavioural changes reduce connectivity  
797 and the potential for disease spread in wild mice contact networks. *Scientific reports* **6**, 31790  
798 (2016).
- 799 32. Levin, I.I. et al. Stress response, gut microbial diversity and sexual signals correlate with social  
800 interactions. *Biol. Lett.* **12**, 20160352 (2016).
- 801 33. Saltzer, J.H., Reed, D.P. & Clark, D.D. End-to-end arguments in system design. *ACM  
802 Transactions on Computer Systems* **100**, 277-288 (1984).
- 803 34. Schmidt, A. et al. Cross-Layer Pacing for Predictably Low Latency. *Proc. 6th Intl. Worksh. on  
804 Ultra-Low Latency in Wireless Networks (Infocom ULLWN)*. IEEE (2019).
- 805 35. Blobel, J. & Dressler, F. in 2017 IEEE Conference on Computer Communications Workshops  
806 (INFOCOM WKSHPs) 984-985 (IEEE, 2017).
- 807 36. Nabeel, M., Amjad, M.S. & Dressler, F. in 2018 IEEE Global Communications Conference  
808 (GLOBECOM) 1-6 (IEEE, 2018).



- 809 37. Teitelbaum, C.S. & Mueller, T. Beyond Migration: Causes and Consequences of Nomadic  
810 Animal Movements. *Trends Ecol. Evol.* (2019).
- 811 38. Stroeymeyt, N. et al. Social network plasticity decreases disease transmission in a eusocial  
812 insect. *Science* **362**, 941-945 (2018).
- 813 39. Consortium, T.Q. Networking Our Way to Better Ecosystem Service Provision. *Trends Ecol.*  
814 *Evol.* **31**, 105-115 (2016).
- 815 40. Nowak, T., Hartmann, M., Zech, T. & Thielecke, J. in 2016 IEEE-APS Topical Conference on  
816 Antennas and Propagation in Wireless Communications (APWC) 110-113 (IEEE, 2016).
- 817 41. Nowak, T., Hartmann, M. & Thielecke, J. Unified performance measures in network  
818 localization. *EURASIP Journal on Advances in Signal Processing* **2018**, 48 (2018).
- 819 42. Hartmann, M., Nowak, T., Pfandenhauer, O., Thielecke, J. & Heuberger, A. in 2016 12th  
820 Annual Conference on Wireless On-demand Network Systems and Services (WONS) 1-8  
821 (IEEE, 2016).
- 822 43. Nowak, T., Hartmann, M. & Thielecke, J. in 2018 11th German Microwave Conference  
823 (GeMiC) 115-118 (IEEE, 2018).
- 824 44. Nowak, T., Hartmann, M., Patino-Studencki, L. & Thielecke, J. in 2016 13th Workshop on  
825 Positioning, Navigation and Communications (WPNC) 1-6 (IEEE, 2016).
- 826 45. Duda, N. et al. BATS: Adaptive Ultra Low Power Sensor Network for Animal Tracking.  
827 *Sensors* **18**, 3343 (2018).
- 828 46. Hijmans, R.J., Williams, E., Vennes, C. & Hijmans, M.R.J. in Spherical trigonometryv 1.5-7  
829 (2019).
- 830 47. Schadhauer, M., Robert, J. & Heuberger, A. in Smart SysTech 2016; European Conference  
831 on Smart Objects, Systems and Technologies 1-9 (VDE, 2016).
- 832 48. Wagemann, P., Dietrich, C., Distler, T., Ulbrich, P. & Schröder-Preikschat, W. Whole-system  
833 worst-case energy-consumption analysis for energy-constrained real-time systems. *Leibniz*  
834 *International Proceedings in Informatics, LIPIcs 106 (2018)* **106**, 24 (2018).
- 835 49. Schirmer, A., Herde, A., Eccard, J.A. & Dammhahn, M. Individuals in space: personality-  
836 dependent space use, movement and microhabitat use facilitate individual spatial niche  
837 specialization. *Oecologia* **189**, 647-660 (2019).
- 838 50. Ripperger, S. et al. Proximity sensors on common noctule bats reveal evidence that mothers  
839 guide juveniles to roosts but not food. *Biol. Lett.* **15**, 20180884 (2019).

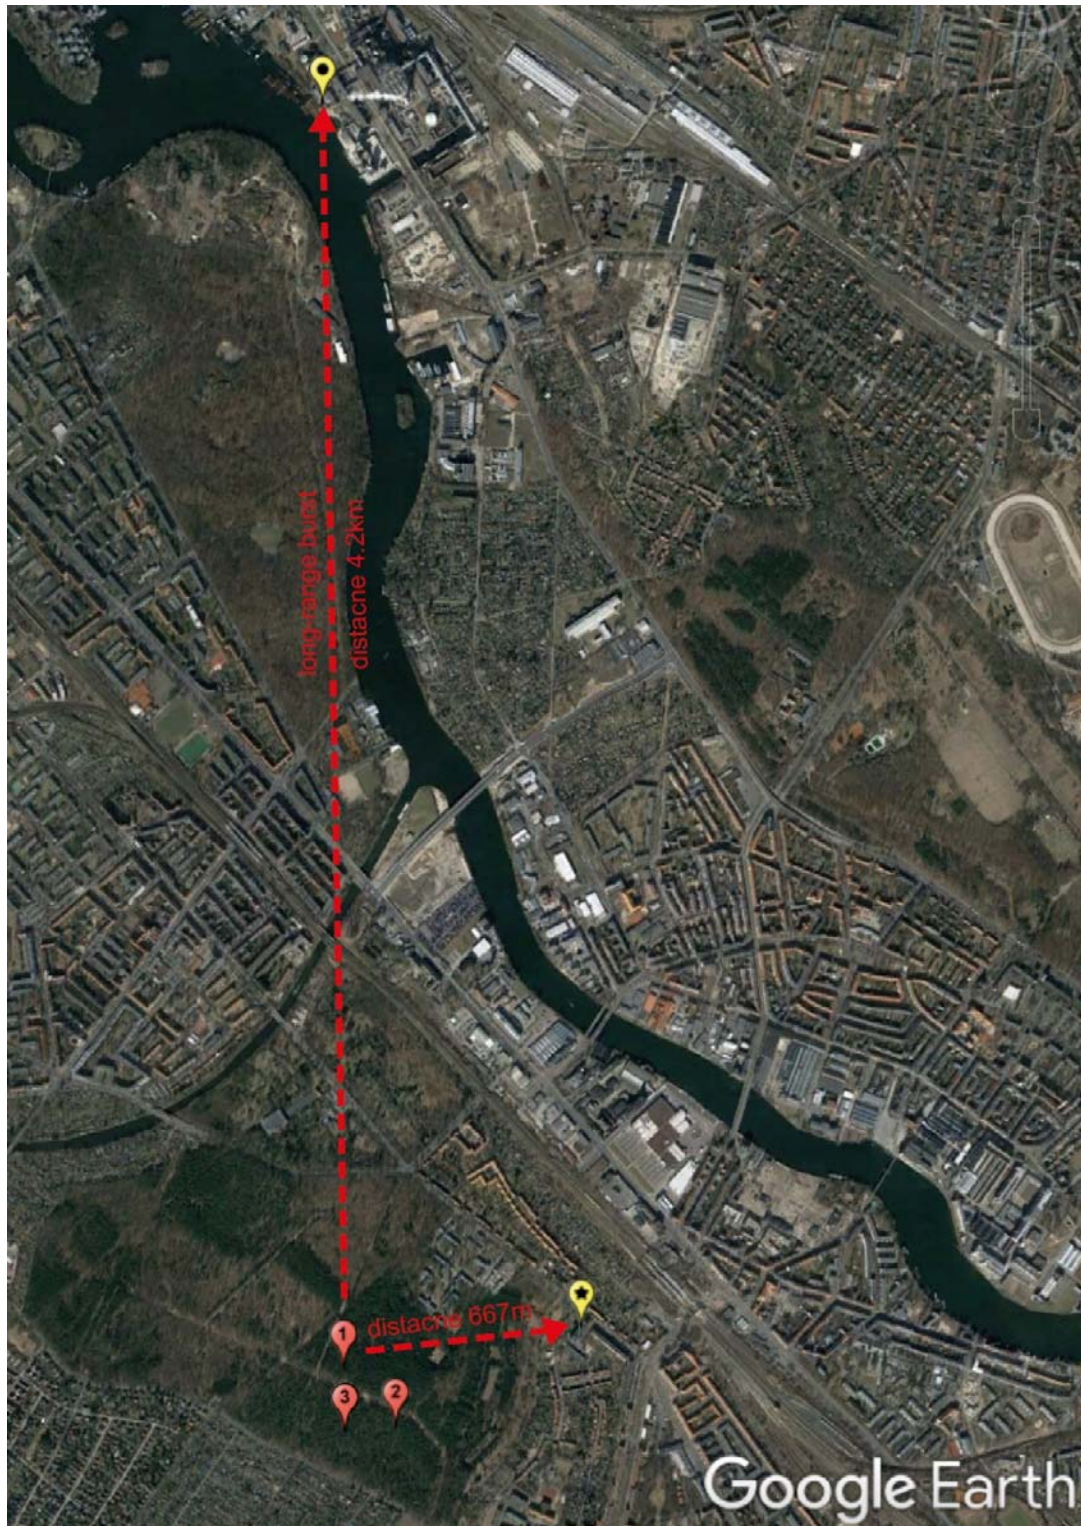

840

841 **Supplementary Figure 1: Experimental setup for long-range telemetry in the city of**  
842 **Berlin, Germany.** Yellow symbols mark the positions of two long-range telemetry receivers  
843 (asterisk = retirement home, circle = cogeneration plant). Red symbols show the locations of  
844 bat day roosts 1 to 3 (tree holes). Map data ©2019 GeoBasis-DE/BKG (©2009), Google.

845

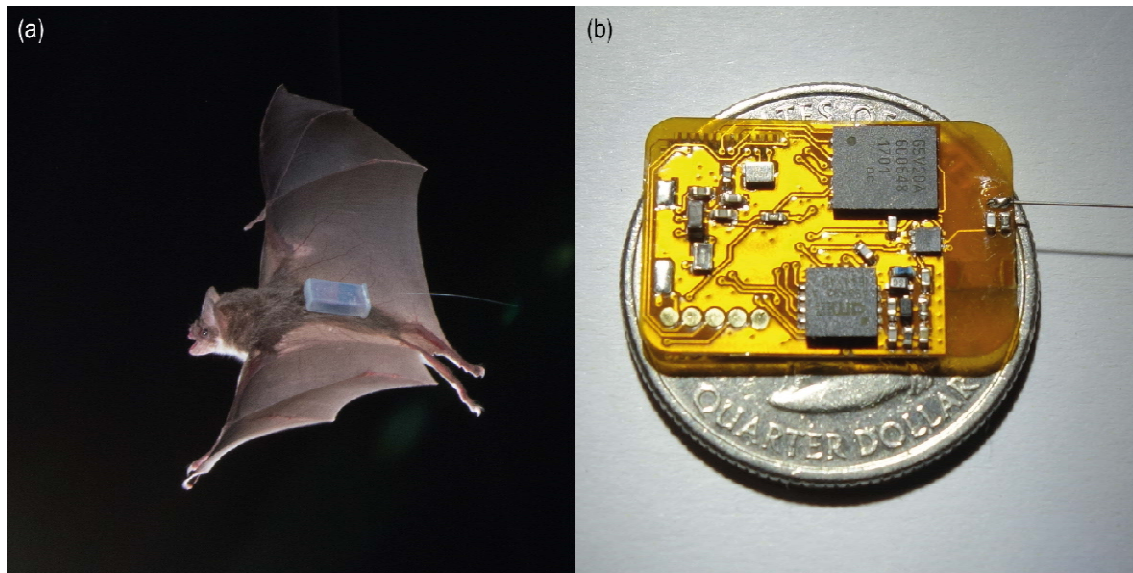

846

847 **Supplementary Figure 2: animal-borne mobile node for proximity sensing.** (a) Common  
848 vampire bat (*Desmodus rotundus*) carrying a mobile node housed in a plastic case; (b) bare  
849 mobile node on a quarter US dollar coin for comparison of size .

850

851

852 **Supplementary Table 1: Glossary.** Description of hardware components, communication  
853 and data types and software tasks considered for the energy model.

| Keyword             | Description                                                                                                                                                                                                                   |
|---------------------|-------------------------------------------------------------------------------------------------------------------------------------------------------------------------------------------------------------------------------|
| <b>Hardware</b>     |                                                                                                                                                                                                                               |
| Mobile node (MN)    | Animal-borne sensor node.                                                                                                                                                                                                     |
| Ground node (GN)    | Multifunctional ground-based sensor nodes. Depending on the GN-configuration, it receives data from MNs, triggers transmission of localization packets at the MN, or triggers the transmission of presence signals at the MN. |
| Localization node   | Sensor node containing a dual-band antenna for high-resolution positioning of MNs. Arranged in a tracking grid.                                                                                                               |
| Long-range receiver | Long-range telemetry-dedicated sensor node for receiving long-range bursts.                                                                                                                                                   |

| <b>Communication and data types</b>     |                                                                                                                                                         |
|-----------------------------------------|---------------------------------------------------------------------------------------------------------------------------------------------------------|
| Ground node beacon<br>(GN-beacon)       | A packet sent by a ground node that triggers action on the MN (e.g., data download).                                                                    |
| Mobile node beacon<br>(MN-beacon)       | A packet sent by a mobile node. It contains a wakeup sequence which wakes other MNs from standby.                                                       |
| Long-range burst                        | A packet embedded in the wakeup sequence of the MN-beacon for data transmission to a long-range receiver.                                               |
| Localization packet                     | A packet sent by a MN to localization nodes for high-resolution tracking. Transmission is initiated by a GN-beacon.                                     |
| Presence Signal                         | A packet sent by a MN to indicate the presence of a bat in range of a GN. Transmission is initiated by a GN-beacon.                                     |
| <b>Software task on the mobile node</b> |                                                                                                                                                         |
| (i) standby                             | An idle state where only mandatory devices are active (e.g., wakeup receiver). The idle state is terminated by the reception of a wakeup.               |
| (ii) sending beacons                    | Sending a MN-beacon to wake nearby MNs from standby. Nearby MNs immediately send their IDs in return.                                                   |
| (iii) receiving beacons                 | If the wakeup receiver receives a wakeup sequence, the conventional receiver is activated to receive the IDs of nearby MNs (encoded in the MN-beacons). |
| (iv) observing ground node availability | Every 2 s the receiver is activated to check whether GN-beacons are received.                                                                           |
| (v) transmitting data to a ground node  | If beacons of a download-dedicated GN are received, the transmitter is activated and data download is initiated.                                        |
| (vi) sending localization packets       | If beacons of a tracking-dedicated GN are received, localization packets are sent (duty cycle 8/s; 868MHz & 2.4GHz)                                     |
| (vii) sending presence signals          | If beacons of a GN are received, a presence signals is send                                                                                             |

854

855

856
